# Supplementary material for: A cell state-specific metabolic vulnerability to GPX4-dependent ferroptosis in glioblastoma
Source: PubMed Central journal article supplement (PMC11480389; doi:10.1038/s44318-024-00176-4), 2024-08-27
Supplement: 44318_2024_176_MOESM1_ESM.pdf [file 44318_2024_176_MOESM1_ESM.pdf]

**Table EV1: Common Differentially Expressed Genes in Persister Cells and N1IC Glioma Cells**

| <b>N1IC_up<br/>( l2fc ≥1)</b> | <b>N1IC_down<br/>(l2fc≤-1)</b> | <b>N1IC_up<br/>(l2fc≥0.5)</b> | <b>N1IC_down<br/>(l2fc≤-0.5)</b> | <b>N1IC_up<br/>(l2fc&gt;0)</b> | <b>N1IC_down<br/>(l2fc&lt;0)</b> |
|-------------------------------|--------------------------------|-------------------------------|----------------------------------|--------------------------------|----------------------------------|
| Acss1                         | Abhd2                          | Acss1                         | Abhd2                            | Acss1                          | Abhd2                            |
| Ankrd46                       | Cdk14                          | Ankrd46                       | Ago2                             | Ankrd46                        | Acaca                            |
| Arhgef28                      | Cdk17                          | App                           | Ank2                             | App                            | Ago2                             |
| Cacna1e                       | Cited2                         | Arhgef28                      | Apba2                            | Arhgef28                       | Ank2                             |
| Cald1                         | Cyfp1                          | Bcan                          | Ccdc92                           | Bcan                           | Apba2                            |
| Capg                          | Dennd2a                        | Bhlhe40                       | Cdk13                            | Bhlhe40                        | B3gat1                           |
| Chrm3                         | Evl                            | Cacna1e                       | Cdk14                            | Cacna1e                        | Cab39                            |
| Csrp1                         | Fbrsl1                         | Cald1                         | Cdk17                            | Cald1                          | Ccdc92                           |
| Ehd3                          | Fry                            | Capg                          | Cited2                           | Calm1                          | Cdk13                            |
| Fabp7                         | Fscn1                          | Ccdc174                       | Cnot10                           | Capg                           | Cdk14                            |
| Fam102a                       | Fzd1                           | Cdc5l                         | Col11a1                          | Ccdc174                        | Cdk17                            |
| Fam210b                       | Gab2                           | Chrm3                         | Cyfp1                            | Ccnd2                          | Cited2                           |
| Fam46a                        | Gpc1                           | Csrp1                         | Ddx39b                           | Cd47                           | Cldn11                           |
| Has2                          | Hmox1                          | Dct                           | Dennd2a                          | Cdc5l                          | Cnot10                           |
| Hes1                          | Hnrnpa0                        | Ehd3                          | Dpysl3                           | Chrm3                          | Col11a1                          |
| Hes5                          | Jag1                           | Emc2                          | Evl                              | Csrp1                          | Cyfp1                            |
| Hey1                          | Kansl1                         | Fabp7                         | Fam76b                           | Ctnnb1                         | Ddx39b                           |
| Hmcn1                         | Klf13                          | Fam102a                       | Fbrsl1                           | Dct                            | Dennd2a                          |
| Id3                           | Mib1                           | Fam210b                       | Fchsd2                           | Ehd3                           | Dpysl3                           |
| Ifit3                         | Mn1                            | Fam46a                        | Fry                              | Emc2                           | Epb41l2                          |
| Kbtbd11                       | Myt1                           | Has2                          | Fscn1                            | Fabp7                          | Evl                              |
| Litaf                         | Nav3                           | Hes1                          | Fzd1                             | Fam102a                        | Fam76b                           |
| Ncald                         | Ncor2                          | Hes5                          | Gab2                             | Fam210b                        | Fbrsl1                           |
| Pex26                         | Nova1                          | Hey1                          | Gatad1                           | Fam46a                         | Fchsd2                           |
| Pla2g4a                       | Ntn1                           | Hmcn1                         | Glud1                            | Frg1                           | Fry                              |
| Plp1                          | Pde3b                          | Id3                           | Gpc1                             | Gng12                          | Fscn1                            |
| Rassf4                        | Pdgfa                          | Ifit3                         | Hmox1                            | Has2                           | Fzd1                             |
| Runx3                         | Phyhipl                        | Kbtbd11                       | Hnrnpa0                          | Hes1                           | Gab2                             |
| Sat1                          | Ranbp9                         | Kcnj10                        | Jag1                             | Hes5                           | Gatad1                           |
| Serpine2                      | Sipa1l1                        | Lef1                          | Kansl1                           | Hey1                           | Glud1                            |
| Shc4                          | Sipa1l3                        | Litaf                         | Khdrbs3                          | Hmcn1                          | Gpc1                             |
| Sorl1                         | Tbkbp1                         | Mcam                          | Klf13                            | Id3                            | Gsap                             |
| Spats2l                       | Tnr                            | Ncald                         | Kpnb1                            | Ifit3                          | Hmox1                            |
| Tmc6                          | Ubfd1                          | Ndufa4                        | Magi2                            | Igsf3                          | Hnrnpa0                          |
| Trim2                         | Wdr38                          | Nes                           | Mbtd1                            | Kank1                          | Igfbp2                           |
| Zfhx4                         | Xylt1                          | Pex26                         | Mib1                             | Kbtbd11                        | Jag1                             |
| Zfp36l1                       | Ywhah                          | Pla2g4a                       | Mn1                              | Kcnj10                         | Kansl1                           |
|                               | Zbtb18                         | Plp1                          | Mtss1l                           | Lef1                           | Khdrbs3                          |
|                               | Zc3h4                          | Polr2b                        | Myt1                             | Litaf                          | Klf13                            |
|                               | Zcchc8                         | Ptn                           | Nav3                             | Lmo4                           | Kpnb1                            |
|                               | Zfand5                         | Rassf4                        | Nckap1                           | Mcam                           | Magi2                            |
|                               |                                | Rsu1                          | Ncor2                            | Ncald                          | Mbtd1                            |
|                               |                                | Runx3                         | Nova1                            | Ndufa4                         | Mib1                             |
|                               |                                | Sat1                          | Ntn1                             | Nes                            | Mn1                              |
|                               |                                | Serpine2                      | Olig1                            | Pdgfra                         | Msl2                             |
|                               |                                | Shc4                          | Osbp16                           | Pex26                          | Mtss1l                           |
|                               |                                | Sorl1                         | Oxr1                             | Pla2g4a                        | Myt1                             |
|                               |                                | Spats2l                       | Pde3b                            | Plp1                           | Nav3                             |
|                               |                                | Tmc6                          | Pdgfa                            | Polr2b                         | Nckap1                           |
|                               |                                | Trim2                         | Phyhipl                          | Psap                           | Ncor2                            |
|                               |                                | Trio                          | Polg                             | Ptn                            | Nova1                            |
|                               |                                | Ttyh1                         | Ppm1f                            | Rassf4                         | Ntn1                             |
|                               |                                | Wbp4                          | Ptbp2                            | Rsu1                           | Olig1                            |

|  |  |         |         |          |         |
|--|--|---------|---------|----------|---------|
|  |  | Zfhx4   | Pten    | Runx3    | Osbpl6  |
|  |  | Zfp36l1 | Ranbp9  | Sat1     | Oxr1    |
|  |  |         | Rhob    | Serpine2 | Pde3b   |
|  |  |         | Sema3d  | Shc4     | Pdgfa   |
|  |  |         | Sipa1l1 | Slu7     | Phyhipl |
|  |  |         | Sipa1l3 | Sorl1    | Polg    |
|  |  |         | Sox6    | Spats2l  | Ppm1f   |
|  |  |         | Tbkbp1  | Tbca     | Ptbp2   |
|  |  |         | Tet2    | Tcf4     | Pten    |
|  |  |         | Tnr     | Tmc6     | Ranbp9  |
|  |  |         | Ubfd1   | Trim2    | Rhob    |
|  |  |         | Ubl3    | Trio     | Sema3d  |
|  |  |         | Wdr38   | Ttyh1    | Sipa1l1 |
|  |  |         | Xylt1   | Ugp2     | Sipa1l3 |
|  |  |         | Ywhah   | Vmp1     | Sox2    |
|  |  |         | Zbtb18  | Wbp4     | Sox6    |
|  |  |         | Zc3h4   | Zc3h15   | Tbkbp1  |
|  |  |         | Zcchc8  | Zfhx4    | Tet2    |
|  |  |         | Zfand5  | Zfp36l1  | Tnr     |
|  |  |         |         |          | Ubfd1   |
|  |  |         |         |          | Ubl3    |
|  |  |         |         |          | Wdr38   |
|  |  |         |         |          | Xylt1   |
|  |  |         |         |          | Ywhah   |
|  |  |         |         |          | Zbtb18  |
|  |  |         |         |          | Zc3h4   |
|  |  |         |         |          | Zcchc8  |
|  |  |         |         |          | Zfand5  |
