# Supplementary material for: A cell state-specific metabolic vulnerability to GPX4-dependent ferroptosis in glioblastoma
Source: PubMed Central journal article supplement (PMC11480389; doi:10.1038/s44318-024-00176-4), 2024-08-27
Supplement: 44318_2024_176_MOESM2_ESM.pdf [file 44318_2024_176_MOESM2_ESM.pdf]

**Table EV2: Clinical and pathologic patient characteristics of organotypic slice culture specimens**

| Tissue ID | Age range | Sex | Location       | Diagnosis | IDH1 Status | EGFR status | MGMT methylation |
|-----------|-----------|-----|----------------|-----------|-------------|-------------|------------------|
| 6181      | 30-39     | F   | Frontotemporal | AA        | Mutant      | Unamplified | Methylated       |
| 6328      | 70-79     | F   | Left frontal   | GBM       | Wildtype    | Amplified   | Methylated       |
| 6458      | 50-59     | M   | Right frontal  | GBM       | Wildtype    | Amplified   | Methylated       |
| 6528      | 60-69     | F   | Left temporal  | GBM       | Wildtype    | Unamplified | Unmethylated     |
| 6534      | 50-59     | F   | Right temporal | GBM       | Wildtype    | Unamplified | Unmethylated     |
| 6545      | 30-39     | M   | Right Frontal  | GBM       | Wildtype    | Unamplified | Unmethylated     |
