# Supplementary material for: A cell state-specific metabolic vulnerability to GPX4-dependent ferroptosis in glioblastoma
Source: PubMed Central journal article supplement (PMC11480389; doi:10.1038/s44318-024-00176-4), 2024-08-27

Figure S5f

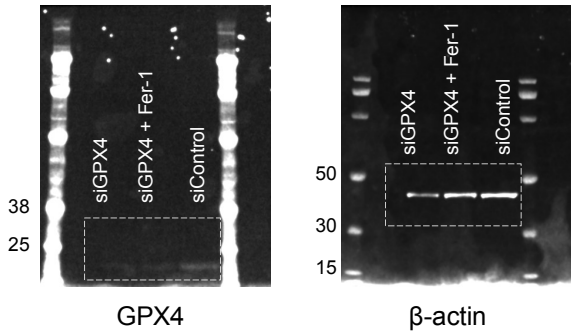

Figure S6d

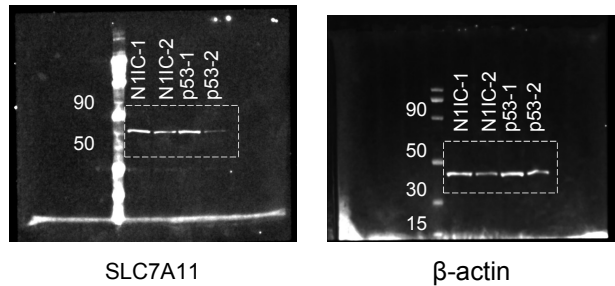

Supplement: 44318_2024_176_MOESM20_ESM.pdf [file 44318_2024_176_MOESM20_ESM.pdf]
